# Supplementary material for: The Sex Difference in 6-h Ultra-Marathon Running—The Worldwide Trends from 1982 to 2020
Source: MDPI journal article supplement (doi:10.3390/medicina58020179), 2022-01-25
Supplement: s1 [file s1]

# SUPPLEMENTARY TABLES

**Supplementary Table 1.** Descriptive statistics (mean and standard deviation) and linear regression results to verify the predictors associated with running speed in female ultra-marathoners from different countries.

|                    | $\beta$   | <i>p</i> -value | Frequency (%) | Age (years)   | Distance (km) | Running speed (km/h) |
|--------------------|-----------|-----------------|---------------|---------------|---------------|----------------------|
|                    |           |                 |               | Mean (Std)    | Mean (Std)    | Mean (Std)           |
| Russia             | Reference | Reference       | 452 (1.95%)   | 38.89 (6.19)  | 60.06 (7.71)  | 10.01 (1.28)         |
| Cyprus             | -0.05736  | 0.93958         | 2 (0.01%)     | 34 (2.83)     | 57.11 (6.13)  | 9.93 (0.68)          |
| Ukraine            | -0.39729  | 0.02272*        | 42 (0.18%)    | 40.32 (11.16) | 56.71 (7.66)  | 9.86 (2.14)          |
| Island             | -0.32848  | 0.31361         | 11 (0.05%)    | 33.18 (5.53)  | 58.35 (3.86)  | 9.72 (0.64)          |
| Belgium            | -0.1956   | 0.01131*        | 339 (1.46%)   | 44.58 (7.5)   | 58.2 (7.45)   | 9.7(1.24)            |
| Monaco             | -0.05927  | 0.95578         | 1 (0%)        | 41            | 58.15         | 9.69                 |
| Albania            | -0.09429  | 0.81674         | 7 (0.03%)     | 43.86 (1.07)  | 57.78 (6.17)  | 9.63 (1.03)          |
| Denmark            | -0.1359   | 0.05213         | 615 (2.65%)   | 43.11 (8.17)  | 53.69 (6.31)  | 9.58 (1.16)          |
| Poland             | -0.16411  | 0.20192         | 98 (0.42%)    | 38.15 (7.71)  | 57.27 (8.43)  | 9.55 (1.4)           |
| Croatia            | -0.24846  | 0.16918         | 43 (0.19%)    | 35.13 (7.78)  | 50.11 (4.49)  | 9.52 (1.02)          |
| Netherlands        | -0.38433  | <0.001*         | 545 (2.35%)   | 45.86 (7.47)  | 57.04 (6.84)  | 9.51 (1.14)          |
| Romania            | -0.39856  | 0.00868         | 56 (0.24%)    | 43.1 (9.52)   | 56.92 (6.78)  | 9.49 (1.13)          |
| Hungary            | -0.45297  | <0.001*         | 826 (3.56%)   | 39.03 (7.41)  | 56.55 (6.86)  | 9.42 (1.14)          |
| Norway             | -0.3659   | <0.001*         | 469 (2.02%)   | 44.66 (10.18) | 56.25 (7.24)  | 9.38 (1.21)          |
| Dominican Republic | -0.42139  | 0.69341         | 1 (0%)        | 49            | 57.45 (6.95)  | 9.35                 |
| New Zealand        | -0.6458   | 0.00001*        | 63 (0.27%)    | 41.14 (8.81)  | 56.01 (6.46)  | 9.34 (1.08)          |
| Portugal           | 0         | <0.001*         | 5 (0.02%)     | 36.79 (9.5)   | 55.92 (4.89)  | 9.32 (0.82)          |
| Austria            | -0.60366  | <0.001*         | 781 (3.37%)   | 43.14 (8.89)  | 55.83 (6.84)  | 9.3 (1.14)           |
| Latvia             | -0.66716  | 0.00631*        | 21 (0.09%)    | 37.3 (8.8)    | 55.77 (4.65)  | 9.3 (0.78)           |
| Northern Macedonia | -0.78261  | 0.30115         | 2 (0.01%)     | 27 (2.83)     | 55.77 (10.98) | 9.29 (1.83)          |
| Spain              | -0.53646  | 0.00001*        | 110 (0.47%)   | 40.19 (8.61)  | 49.9          | 9.28 (1.35)          |
| Lithuania          | -0.22253  | 0.47656         | 17 (0.07%)    | 37.5 (2.43)   | 55.57 (7.78)  | 9.26 (1.3)           |

|               |          |          |               |               |               |             |
|---------------|----------|----------|---------------|---------------|---------------|-------------|
| South Korea   | -0.52147 | 0.23473  | 9 (0.04%)     | 47.67 (4.18)  | 55.4 (4.76)   | 9.23 (0.79) |
| Finland       | -0.61279 | <0.001*  | 441 (1.9%)    | 42.49 (8.77)  | 54.44 (5.45)  | 9.21 (1.02) |
| Slovenia      | -0.71067 | <0.001*  | 170 (0.73%)   | 48 (7.24)     | 55.22 (7.52)  | 9.2 (1.25)  |
| Thailand      | -1.74941 | 0.00111* | 4 (0.02%)     | 44.75 (4.57)  | 46.73         | 9.16 (1.11) |
| Japan         | -0.50082 | <0.001*  | 529 (2.28%)   | 45.15 (8.16)  | 54.71 (6.74)  | 9.12 (1.12) |
| Estonia       | -0.80036 | 0.00009* | 30 (0.13%)    | 39.14 (9.55)  | 55.66 (8.1)   | 9.07 (0.91) |
| Germany       | -0.7584  | <0.001*  | 4358 (18.8%)  | 45.46 (9.11)  | 52.32 (6.62)  | 9.07 (1.16) |
| Hong Kong     | -0.74146 | 0.00002* | 49 (0.21%)    | 42.4 (9.22)   | 54.37 (5.67)  | 9.06 (0.95) |
| France        | -0.75715 | <0.001*  | 2013 (8.68%)  | 46.74 (8.36)  | 55.23 (6.14)  | 9.04 (1.02) |
| China         | -0.713   | <0.001*  | 134 (0.58%)   | 38.12 (8.46)  | 53.44 (6.23)  | 9.03 (1.04) |
| Australia     | -0.82947 | <0.001*  | 658 (2.84%)   | 42.22 (10.46) | 54.14 (6.57)  | 9.02 (1.1)  |
| Ireland       | -0.46293 | 0.0164*  | 48 (0.21%)    | 40.3 (5.39)   | 54.11 (6.89)  | 9.02 (1.15) |
| Italy         | -0.76297 | <0.001*  | 2662 (11.48%) | 44.72 (8.45)  | 54.09 (6.65)  | 9.02 (1.11) |
| Madagascar    | -0.49379 | 0.01443* | 33 (0.14%)    | 50.83 (6.42)  | 49.36 (5.85)  | 9.02 (0.77) |
| Argentina     | -0.81259 | <0.001*  | 169 (0.73%)   | 42.35 (8.53)  | 53.84 (6.03)  | 8.97 (1.01) |
| Slovakia      | -1.10815 | <0.001*  | 49 (0.21%)    | 36.66 (11.65) | 53.84 (6.58)  | 8.97 (1.1)  |
| Czech         | -1.07824 | <0.001*  | 224 (0.97%)   | 35.43 (8.68)  | 59.59 (4.07)  | 8.95 (1.05) |
| Canada        | -1.01598 | <0.001*  | 626 (2.7%)    | 41.89 (9.6)   | 46.35         | 8.93 (1.02) |
| Chile         | -1.10336 | 0.02159* | 5 (0.02%)     | 33.2 (2.17)   | 53.6 (6.13)   | 8.91 (1.04) |
| Sweden        | -0.68258 | <0.001*  | 1494 (6.44%)  | 41.01 (10.09) | 53.42 (4.89)  | 8.9 (0.82)  |
| Bosnia        | -1.13915 | 0.01769* | 5 (0.02%)     | 33 (6.28)     | 53.36 (6.33)  | 8.89 (1.05) |
| Bulgaria      | -0.98704 | <0.001*  | 41 (0.18%)    | 38.45 (8.56)  | 53.28 (5.41)  | 8.88 (0.9)  |
| Greece        | -0.98391 | <0.001*  | 37 (0.16%)    | 41.66 (5.66)  | 53.22 (5.07)  | 8.87 (0.84) |
| Mongolia      | -0.92415 | 0.01018* | 11 (0.05%)    | 37.78 (12.62) | 53.21 (6.34)  | 8.87 (1.06) |
| Switzerland   | -0.91954 | <0.001*  | 71 (0.31%)    | 44.76 (8.94)  | 53.16 (6.55)  | 8.86 (1.09) |
| Belarus       | -1.12883 | 0.00006* | 15 (0.06%)    | 43.8 (17.15)  | 53.02 (6.69)  | 8.84 (1.11) |
| Brazil        | -1.07312 | <0.001*  | 131 (0.56%)   | 41.46 (9.75)  | 52.66 (5.4)   | 8.78 (0.9)  |
| Turkey        | 0.82468  | 0.27577  | 3 (0.01%)     | 44.5 (0.71)   | 59.14 (12.87) | 8.77 (0.92) |
| Mexico        | -1.13418 | 0.00291* | 8 (0.03%)     | 37.25 (5.6)   | 54.14 (4.6)   | 8.75 (1.11) |
| Montenegro    | -1.5308  | 0.00433* | 4 (0.02%)     | 26.5 (14.48)  | 52.4 (2.2)    | 8.73 (0.37) |
| Great Britain | -0.83693 | <0.001*  | 427 (1.84%)   | 44.45 (8.45)  | 54.26 (6.11)  | 8.72 (1.1)  |

|               |          |          |               |               |              |             |
|---------------|----------|----------|---------------|---------------|--------------|-------------|
| Luxemburg     | -0.82892 | 0.27334  | 3 (0.01%)     | 48.5 (3.54)   | 49.66 (3.13) | 8.69 (0.55) |
| Paraguay      | -1.37244 | 0.00032* | 9 (0.04%)     | 34.13 (7.68)  | 51.66 (3.23) | 8.61 (0.54) |
| South Africa  | -1.22955 | <0.001*  | 22 (0.09%)    | 39.79 (11.89) | 51.39 (5.18) | 8.56 (0.86) |
| Serbia        | -1.07577 | <0.001*  | 96 (0.41%)    | 39.23 (12.24) | 51.37 (4.53) | 8.56 (0.76) |
| Kazakhstan    | -1.27672 | 0.00362* | 6 (0.03%)     | 45.67 (14.31) | 51.23 (5.48) | 8.54 (0.91) |
| Colombia      | -0.74786 | 0.48416  | 2 (0.01%)     | 48            | 54.18 (6.25) | 8.35 (0.75) |
| Ecuador       | -1.51436 | 0.15654  | 1 (0%)        | 44            | 56.13        | 8.32        |
| Malaysia      | -1.34487 | 0.00019* | 16 (0.07%)    | 33 (7.14)     | 52.14        | 8.23 (0.97) |
| India         | -1.61374 | <0.001*  | 18 (0.08%)    | 38 (9.12)     | 49.33        | 8.22 (0.66) |
| Peru          | -1.45911 | 0.00013* | 8 (0.03%)     | 55.25 (7.48)  | 48.53        | 8.09 (0.39) |
| Taiwan        | -0.95756 | <0.001*  | 538 (2.32%)   | 43.56 (8.25)  | 54.99        | 7.99 (0.27) |
| Philippines   | -1.75254 | <0.001*  | 13 (0.06%)    | 48.45 (6.79)  | 47.6         | 7.93 (0.31) |
| Nigeria       | -2.01877 | 0.05893  | 1 (0%)        | 39            | 47.48        | 7.91        |
| Sint Maarten  | -0.82579 | 0.43978  | 1 (0%)        | 40.64 (9.18)  | 53.96        | 7.84 (1.17) |
| Iran          | -2.0425  | 0.05602  | 1 (0%)        | 48            | 46.38        | 7.73        |
| Uruguay       | -0.74809 | <0.001*  | 88 (0.38%)    | 70.4 (53.71)  | 12.28        |             |
| United States | -1.27611 | <0.001*  | 3371 (14.54%) | 70 (40.69)    | 15.21        |             |
| Venezuela     | -0.4645  | 0.66389  | 1 (0%)        | 55.88 (55.88) | 9.31         |             |
| Constant      | 52.8911  | <0.001*  |               |               |              |             |
| Age           | 0.10452  | 0.71356  |               |               |              |             |
| Year event    | -0.02093 | 0.00071* |               |               |              |             |
| Year x Age    | -0.00006 | 0.66075  |               |               |              |             |

Note: \* indicates statistically significant differences for running speed, compared to Russia. Results are presented as mean and standard deviation.

**Supplementary Table 2.** Descriptive statistics (mean and standard deviation) and linear regression results to verify the predictors associated with running speed in male ultra-marathoners from different countries.

|               | $\beta$   | <i>p</i> -value | Frequency (%) | Age<br>(years) | Distance<br>(km) | Running speed<br>(km/h) |
|---------------|-----------|-----------------|---------------|----------------|------------------|-------------------------|
|               |           |                 |               | Mean (Std)     | Mean (Std))      | Mean (Std)              |
| Tunisia       | Reference | Reference       | 17 (0.0%)     | 44.82 (4.59)   | 72.95 (8.02)     | 12.16 (1.46)            |
| Sri Lanka     | -0.023    | 0.986           | 1 (0.0%)      | 36.00          | 71.42 (3.95)     | 11.90 (11.90)           |
| Malta         | 0.177     | 0.804           | 4 (0.0%)      | 61.00 (0.82)   | 69.19(10.39)     | 11.53 (0.75)            |
| Cape Verde    | -0.708    | 0.181           | 9 (0.0%)      | 35.22 (4.29)   | 67.82(7.71)      | 11.30 (1.46)            |
| Montenegro    | -1.127    | 0.240           | 2 (0.0%)      | 40.50 (7.78)   | 65.70(8.31)      | 10.95 (2.29)            |
| Madagascar    | -1.452    | 0.006*          | 11 (0.0%)     | 37.44 (7.00)   | 65.01(8.40)      | 10.83 (1.64)            |
| Macau         | -1.169    | 0.376           | 1 (0.0%)      | -              | 64.88            | 10.81                   |
| Belgium       | -1.374    | <0.001*         | 2784 (3.2%)   | 45.61 (9.59)   | 64.13(9.84)      | 10.69 (1.64)            |
| France        | -2.225    | <0.001*         | 10932 (12.5%) | 46.68 (9.64)   | 57.79(9.34)      | 9.63 (1.32)             |
| Faroe Islands | -0.919    | 0.159           | 5 (0.0%)      | 52.80 (2.59)   | 63.63(8.85)      | 10.61 (1.37)            |
| Russia        | -1.467    | <0.001*         | 2043 (2.3%)   | 43.68 (11.94)  | 63.49            | 10.58 (1.60)            |
| Botswana      | -2.434    | 0.065           | 1 (0.0%)      | 35.00          | 63.20(7.44)      | 10.53                   |
| Venezuela     | -1.337    | 0.096           | 3 (0.0%)      | 41.00 (4.36)   | 62.51            | 10.42 (0.33)            |
| Lithuania     | -1.257    | <0.001*         | 123 (0.1%)    | 42.08 (8.26)   | 62.48(6.55)      | 10.41 (1.39)            |
| Andorra       | -1.195    | 0.094           | 4 (0.0%)      | 50.75 (11.35)  | 62.34(6.97)      | 10.39 (1.73)            |
| Latvia        | -1.591    | <0.001*         | 61 (0.1%)     | 42.55 (8.93)   | 61.24(7.11)      | 10.21 (1.42)            |
| Netherlands   | -1.899    | <0.001*         | 3479 (4.0%)   | 48.41 (9.25)   | 60.32(7.90)      | 10.05 (1.34)            |
| Hungary       | -1.877    | <0.001*         | 1969 (2.3%)   | 41.25 (8.57)   | 60.04            | 10.01 (1.37)            |
| Honduras      | -1.825    | 0.167           | 1 (0.0%)      | 46.00          | 60 (8.75)        | 10.00                   |
| Iceland       | -2.07     | <0.001*         | 15 (0.0%)     | 44.54 (8.01)   | 59.56(7.22)      | 9.93 (0.88)             |
| Spain         | -1.867    | <0.001*         | 1185 (1.4%)   | 43.91 (9.29)   | 59.43(4.28)      | 9.91 (1.55)             |
| Denmark       | -1.954    | <0.001*         | 2089 (2.4%)   | 42.92 (8.02)   | 59.41(7.78)      | 9.90 (1.23)             |
| Morocco       | -1.422    | 0.046*          | 5 (0.0%)      | 45.00 (6.83)   | 59.39(7.40)      | 9.90 (2.01)             |
| Belarus       | -2.139    | <0.001*         | 151 (0.2%)    | 48.30 (13.36)  | 59.18 (5.91)     | 9.86 (1.47)             |
| Bosnia        | -2.043    | <0.001*         | 40 (0.0%)     | 40.88 (10.43)  | 58.90            | 9.82 (1.56)             |
| Norway        | -1.974    | <0.001*         | 1465 (1.7%)   | 45.88 (11.09)  | 58.87 (9.30)     | 9.81 (1.46)             |

|              |        |         |               |               |               |              |
|--------------|--------|---------|---------------|---------------|---------------|--------------|
| Austria      | -2.133 | <0.001* | 3302 (3.8%)   | 43.37 (9.82)  | 58.84 (7.74)  | 9.81 (1.40)  |
| Slovenia     | -2.139 | <0.001* | 506 (0.6%)    | 41.69 (8.92)  | 58.78 (7.62)  | 9.80 (1.47)  |
| Peru         | -1.772 | <0.001* | 25 (0.0%)     | 34.39 (3.26)  | 58.62 (7.95)  | 9.77 (1.52)  |
| Romania      | -1.963 | <0.001* | 114 (0.1%)    | 39.06 (8.44)  | 58.60 (8.23)  | 9.77 (1.36)  |
| Switzerland  | -2.057 | <0.001* | 320 (0.4%)    | 45.79 (10.18) | 58.55 (8.31)  | 13.26 (9.76) |
| Ukraine      | -2.216 | <0.001* | 142 (0.2%)    | 40.91 (11.05) | 58.52 (4.90)  | 9.75 (1.38)  |
| Poland       | -2.06  | <0.001* | 421 (0.5%)    | 38.09 (8.56)  | 58.38 (8.19)  | 9.73 (1.72)  |
| Slovakia     | -2.306 | <0.001* | 358 (0.4%)    | 41.27 (11.30) | 58.33 (7.49)  | 14.07 (9.72) |
| Czechia      | -2.33  | <0.001* | 584 (0.7%)    | 39.88 (10.36) | 58.30 (2.85)  | 9.72 (1.30)  |
| Greenland    | -2.093 | 0.001*  | 5 (0.0%)      | 45.80 (4.87)  | 57.98 (7.18)  | 9.66 (0.47)  |
| Mongolia     | -2.512 | <0.001* | 22 (0.0%)     | 30.22 (7.67)  | 57.86         | 9.64 (1.14)  |
| Germany      | -2.189 | <0.001* | 14452 (16.6%) | 47.78 (9.80)  | 57.70 (8.21)  | 9.62 (1.36)  |
| Estonia      | -2.254 | <0.001* | 68 (0.1%)     | 41.74 (9.26)  | 57.69         | 9.62 (1.29)  |
| Kazakhstan   | -2.368 | <0.001* | 45 (0.1%)     | 40.03 (13.06) | 57.62 (8.04)  | 9.60 (1.35)  |
| Australia    | -2.363 | <0.001* | 1709 (2.0%)   | 44.15 (9.91)  | 57.48         | 9.58 (1.38)  |
| Sweden       | -2.229 | <0.001* | 3884 (4.5%)   | 45.06 (10.54) | 57.44 (0.96)  | 15.26 (9.57) |
| Argentina    | -2.196 | <0.001* | 429 (0.5%)    | 43.24 (9.35)  | 57.31 (8.96)  | 9.55 (1.29)  |
| Finland      | -2.25  | <0.001* | 937 (1.1%)    | 45.18 (9.86)  | 57.31 (5.29)  | 9.55 (1.27)  |
| Japan        | -2.122 | <0.001* | 2048 (2.3%)   | 44.07 (9.92)  | 57.05 (7.70)  | 9.51 (1.42)  |
| South Africa | -2.357 | <0.001* | 88 (0.1%)     | 40.56 (8.45)  | 56.99         | 9.50 (1.56)  |
| Serbia       | -2.309 | <0.001* | 335 (0.4%)    | 45.02 (13.18) | 56.91 (8.55)  | 9.48 (1.29)  |
| New Zealand  | -2.482 | <0.001* | 141 (0.2%)    | 44.29 (11.01) | 56.86 (8.09)  | 9.48 (1.16)  |
| Portugal     | -2.268 | <0.001* | 88 (0.1%)     | 41.67 (9.44)  | 56.80 (6.63)  | 9.47 (1.33)  |
| Ireland      | -2.064 | <0.001* | 102 (0.1%)    | 42.62 (9.32)  | 56.72 (8.51)  | 9.45 (1.49)  |
| Croatia      | -2.358 | <0.001* | 92 (0.1%)     | 42.08 (9.58)  | 56.68 (8.33)  | 9.45 (1.20)  |
| Ecuador      | -2.748 | <0.001* | 11 (0.0%)     | 32.18 (7.99)  | 56.63 (7.68)  | 9.44 (0.98)  |
| China        | -2.267 | <0.001* | 518 (0.6%)    | 40.33 (10.42) | 56.53         | 9.42 (1.32)  |
| Luxembourg   | -2.577 | <0.001* | 41 (0.0%)     | 43.49 (11.72) | 56.50 (12.03) | 9.42 (1.28)  |
| Greece       | -2.524 | <0.001* | 342 (0.4%)    | 42.33 (8.91)  | 56.48 (4.23)  | 9.41 (1.25)  |
| Bulgaria     | -2.525 | <0.001* | 137 (0.2%)    | 36.68 (8.49)  | 56.25 (9.86)  | 9.38 (1.09)  |
| Uruguay      | -2.399 | <0.001* | 196 (0.2%)    | 41.96 (9.15)  | 56.24 (6.91)  | 9.37 (1.12)  |

|                    |        |         |               |               |               |             |
|--------------------|--------|---------|---------------|---------------|---------------|-------------|
| Albania            | -2.976 | <0.001* | 5 (0.0%)      | 30.60 (7.13)  | 56.16 (6.86)  | 9.36 (1.34) |
| Singapura          | -2.542 | <0.001* | 9 (0.0%)      | 39.38 (3.66)  | 56.08 (6.75)  | 9.35 (1.10) |
| Brazil             | -2.446 | <0.001* | 550 (0.6%)    | 41.40 (9.04)  | 56.00 (4.52)  | 9.33 (1.24) |
| San Marino         | -1.925 | <0.001* | 13 (0.0%)     | 59.77 (6.43)  | 55.99 (13.72) | 9.33 (0.89) |
| Cyprus             | -2.85  | <0.001* | 6 (0.0%)      | 32.33 (8.24)  | 55.95 (3.86)  | 9.33 (0.71) |
| Italy              | -2.337 | <0.001* | 13633 (15.6%) | 49.31 (9.43)  | 55.89 (8.06)  | 9.32 (1.28) |
| Jordan             | -2.253 | 0.088   | 1 (0.0%)      | 49.00         | 55.78 (2.67)  | 9.30        |
| South Korea        | -2.656 | <0.001* | 78 (0.1%)     | 46.09 (8.16)  | 55.71 (8.74)  | 9.28 (1.11) |
| Azerbaijan         | -2.52  | 0.056   | 1 (0.0%)      | 39.00         | 55.69 (6.98)  | 9.28        |
| Puerto Rico        | -2.422 | 0.067   | 1 (0.0%)      | 45.00         | 55.69         | 9.28        |
| Great-Britain      | -2.345 | <0.001* | 1252 (1.4%)   | 45.44 (9.29)  | 55.53         | 9.25 (1.38) |
| Algeria            | -2.692 | <0.001* | 11 (0.0%)     | 45.64 (11.23) | 55.52 (6.77)  | 9.25 (0.66) |
| Canada             | -2.781 | <0.001* | 1586 (1.8%)   | 47.27 (11.28) | 55.18 (9.10)  | 9.20 (1.16) |
| India              | -2.386 | <0.001* | 122 (0.1%)    | 36.32 (9.69)  | 55.17 (5.54)  | 9.20 (1.34) |
| Hong Kong          | -2.45  | <0.001* | 202 (0.2%)    | 45.52 (11.04) | 54.69 (10.32) | 9.11 (1.20) |
| Northern Macedonia | -2.766 | <0.001* | 11 (0.0%)     | 41.73 (10.20) | 54.69 (7.97)  | 9.11 (1.12) |
| USA                | -2.893 | <0.001* | 6949 (8.0%)   | 43.61(10.95)  | 53.93         | 8.99 (1.16) |
| Taiwan             | -2.754 | <0.001* | 5 (0.0%)      | 46.74 (9.34)  | 53.49 (8.16)  | 8.91 (1.04) |
| Mexico             | -2.83  | <0.001* | 56 (0.1%)     | 39.05 (9.01)  | 53.37 (9.34)  | 8.89 (1.15) |
| Turkey             | -2.937 | <0.001* | 39 (0.0%)     | 41.57 (8.88)  | 53.08 (9.61)  | 8.85 (1.04) |
| Philippines        | -2.934 | <0.001* | 28 (0.0%)     | 41.67 (10.32) | 52.73 (4.44)  | 8.79 (0.92) |
| Paraguay           | -2.938 | <0.001* | 14 (0.0%)     | 36.17 (6.55)  | 52.64 (6.61)  | 8.77 (1.13) |
| Iran               | -3.091 | 0.001*  | 2 (0.0%)      | 46.00 (14.14) | 52.63 (8.82)  | 8.77 (0.16) |
| Chile              | -3.24  | <0.001* | 40 (0.0%)     | 32.45 (3.36)  | 52.38 (5.34)  | 8.73 (1.19) |
| Nicaragua          | -3.094 | 0.001*  | 2 (0.0%)      | 44.00         | 51.15 (7.75)  | 8.53 (0.64) |
| Indonesia          | -3.059 | 0.021*  | 1 (0.0%)      | 51.00         | 50.60         | 8.43        |
| Malaysia           | -3.222 | <0.001* | 60 (0.1%)     | 41.03 (10.94) | 50.59 (8.99)  | 8.43 (0.71) |
| Nigeria            | -3.864 | <0.001* | 4 (0.0%)      | 28.25 (1.89)  | 50.28 (7.57)  | 8.38 (0.44) |
| Georgia            | -4.165 | 0.002*  | 5 (0.0%)      | 38.00         | 50.08 (7.94)  | 8.35 (0.82) |
| Brunei             | -3.613 | 0.006*  | 1 (0.0%)      | 34.00         | 50.00 (0.57)  | 8.33        |
| Senegal            | -3.383 | <0.001* | 3 (0.0%)      | 46.67 (3.06)  | 49.94 (6.25)  | 8.32 (0.74) |

|            |        |         |          |       |              |             |
|------------|--------|---------|----------|-------|--------------|-------------|
| Panama     | -3.426 | 0.009*  | 1 (0.0%) | 45.00 | 49.89 (8.78) | 8.32        |
| Columbia   | -3.198 | 0.015*  | 1 (0.0%) | 51.00 | 49.54 (6.23) | 8.26        |
| Eritrea    | -4.191 | 0.001*  | 1 (0.0%) | 26.00 | 48.59 (8.25) | 8.10        |
| Tanzania   | -3.033 | 0.002*  | 2        | 65.00 | 47.88 (6.99) | 8.05 (7.98) |
| IRE        | -3.782 | 0.004*  | 1 (0.0%) | 52.00 | 46.09 (2.00) | 7.68        |
| Oman       | -4.78  | <0.001* | 1 (0.0%) | 24.00 | 45.40 (2.48) | 7.57        |
| Constant   | 87.607 | <0.001  |          |       |              |             |
| Event year | -0.037 | <0.001* |          |       |              |             |
| Age x year | -1.43  | <0.001* |          |       |              |             |

Note: \* indicates statistically significant differences for running speed, compared to Tunisia. Results are presented as mean and standard deviation.

**Supplementary Table 3.** Descriptive statistics (mean and standard deviation) and linear regression results to verify the predictors associated with running speed in the top 10 female ultra-marathoners from different countries.

|             | $\beta$   | <i>p</i> -value | Age (years)   | Distance (km) | Running speed (km/h) |
|-------------|-----------|-----------------|---------------|---------------|----------------------|
|             |           |                 | Mean (Std)    | Mean (Std)    | Mean (Std)           |
| Slovenia    | Reference | Reference       | 39.06 (6.06)  | 68.28 (6.33)  | 11.38 (1.06)         |
| Norway      | 0.25      | <0.001*         | 41.23 (10.25) | 66.24 (6.17)  | 11.04 (1.03)         |
| Poland      | 0.54      | <0.001*         | 37.83 (7.25)  | 65.55 (9.16)  | 10.92 (1.53)         |
| Spain       | -0.06     | 0.62            | 38.15 (8.08)  | 64.90 (5.97)  | 10.82 (0.99)         |
| Belgium     | 0.57      | <0.001*         | 42.02(5.99)   | 64.55 (6.93)  | 10.76 (1.16)         |
| Russia      | 0.80      | <0.001*         | 36.57 (10.84) | 63.75 (8.41)  | 10.62 (1.40)         |
| Sweden      | 0.09      | 0.10            | 37.67 (8.57)  | 63.63 (6.59)  | 10.61 (1.10)         |
| Hungry      | 0.21      | <0.001*         | 38.27 (6.41)  | 63.52 (6.45)  | 10.59 (1.08)         |
| Netherlands | 0.28      | <0.001*         | 45.36 (7.23)  | 63.29 (6.39)  | 10.55 (1.06)         |
| Austria     | 0.19      | <0.001*         | 41.35 (8.69)  | 62.74 (6.74)  | 10.46 (1.12)         |
| Romania     | 0.09      | 0.58            | 35.67 (8.73)  | 62.69 (5.72)  | 10.45 (0.95)         |
| Denmark     | 0.56      | <0.001*         | 42.10 (7.02)  | 62.63 (7.50)  | 10.44 (1.25)         |
| Italy       | -0.03     | 0.58            | 41.48 (7.26)  | 62.16 (7.04)  | 10.36 (1.17)         |
| Finland     | 0.09      | 0.19            | 39.88 (9.30)  | 60.88 (5.85)  | 10.15 (0.97)         |
| Japan       | 0.18      | 0.01*           | 44.03 (6.57)  | 60.67 (7.88)  | 10.11 (1.31)         |
| Germany     | 0.06      | 0.22            | 43.00 (7.89)  | 60.47 (7.85)  | 10.08 (1.31)         |
| Uruguay     | -0.06     | 0.68            | 38.50 (6.86)  | 59.36 (4.57)  | 9.89 (0.76)          |
| Czech       | -0.25     | <0.001*         | 34.31 (9.41)  | 58.99 (5.90)  | 9.83 (0.98)          |
| France      | -0.05     | 0.36            | 45.48 (7.45)  | 58.98 (6.59)  | 9.83 (1.10)          |
| China       | 0.04      | 0.69            | 38.52 (9.40)  | 58.87 (7.48)  | 9.81 (1.25)          |
| Croatia     | 0.61      | <0.001*         | 33.42 (7.23)  | 58.87 (6.43)  | 9.81 (1.07)          |
| Taipei      | -0.09     | 0.16            | 42.64 (6.80)  | 58.76 (4.89)  | 9.79 (0.82)          |
| Argentina   | -0.22     | 0.03*           | 42.76 (8.79)  | 58.06 (6.48)  | 9.68 (1.08)          |
| Slovakia    | -0.45     | 0.01*           | 43.07 (13.06) | 57.48 (3.36)  | 9.58 (0.56)          |
| Ireland     | -0.03     | 0.90            | 40.33 (3.54)  | 57.29 (7.00)  | 9.55 (1.17)          |
| Serbia      | -0.40     | <0.001*         | 36.81 (11.53) | 57.13 (7.98)  | 9.52 (1.33)          |
| Canada      | -0.49     | <0.001*         | 39.91 (8.04)  | 57.06 (6.58)  | 9.51 (1.10)          |



|               |       |         |               |              |             |
|---------------|-------|---------|---------------|--------------|-------------|
| Australia     | -0.30 | <0.001* | 41.97 (11.17) | 56.91(6.78)  | 9.48 (1.13) |
| Switzerland   | -0.26 | 0.06    | 43.80 (9.23)  | 56.59 (7.25) | 9.43 (1.21) |
| New Zealand   | 0.22  | 0.34    | 41.52 (9.37)  | 56.28(6.70)  | 9.38 (1.12) |
| Ukraine       | 0.68  | <0.001* | 33.38 (9.09)  | 55.51 (6.34) | 9.25 (1.06) |
| Great Britain | -0.17 | 0.04*   | 45.01 (8.88)  | 54.11 (7.15) | 9.02 (1.19) |
| USA           | -0.65 | <0.001* | 39.84 (8.74)  | 53.49 (6.09) | 8.91(1.02)  |
| Brazil        | -0.20 | 0.14    | 41.12 (9.99)  | 53.40 (5.69) | 8.90 (0.95) |
| South Africa  | -0.15 | 0.62    | 39.36 (7.37)  | 51.65 (6.47) | 8.61 (1.08) |
| Malaysia      | -0.26 | 0.69    |               | 49.97(6.20)  | 8.33 (1.03) |
| Constant      | 70.24 | <0.001* |               |              |             |
| Event year    | -0.03 | <0.001* |               |              |             |
| Age x Year    | 0.00  | <0.001* |               |              |             |

Note: \* indicates statistically significant differences for running speed, compared to Slovenia. Results are presented as mean and standard deviation.

**Supplementary Table 4.** Descriptive statistics (mean and standard deviation) and linear regression results to verify the predictors associated with running speed in the top 100 female ultra-marathoners from different countries.

|             | $\beta$   | <i>p</i> -value | Age (years)   | Distance (km) | Running speed (km/h) |
|-------------|-----------|-----------------|---------------|---------------|----------------------|
|             |           |                 | Mean (Std)    | Mean (Std)    | Mean (Std)           |
| Russia      | Reference | Reference       | 42.27 (8.56)  | 53.82 (6.06)  | 8.97 (1.01)          |
| Belgium     | -0.034    | 0.644           | 42.30 (10.41) | 54.08 (6.59)  | 9.01 (1.10)          |
| Iceland     | -0.171    | 0.598           | 43.19 (8.77)  | 56.04 (6.84)  | 9.34 (1.14)          |
| Ukraine     | -0.235    | 0.175           | 44.45 (7.45)  | 58.52 (7.50)  | 9.75 (1.25)          |
| Denmark     | 0.026     | 0.694           | 41.37 (9.66)  | 52.58 (5.46)  | 8.76 (0.91)          |
| Poland      | -0.003    | 0.984           | 39.03 (7.89)  | 53.28 (5.41)  | 8.88 (0.90)          |
| Netherlands | -0.219    | 0.001           | 42.03 (9.51)  | 53.58 (6.15)  | 8.93 (1.02)          |
| Croatia     | -0.089    | 0.620           | 38.59 (8.20)  | 54.85 (6.30)  | 9.14 (1.05)          |
| Romania     | -0.237    | 0.116           | 34.25 (8.00)  | 57.31 (6.62)  | 9.55 (1.10)          |
| Norway      | -0.197    | 0.005*          | 35.27 (8.82)  | 53.68 (6.45)  | 8.95 (1.07)          |
| Hungary     | -0.290    | <0.001*         | 42.97 (8.12)  | 57.94 (6.88)  | 9.66 (1.15)          |
| Spain       | -0.377    | 0.002*          | 40.00 (9.50)  | 54.81 (5.74)  | 9.14 (0.96)          |
| Austria     | -0.440    | <0.001*         | 42.40 (8.85)  | 55.26 (6.21)  | 9.21 (1.04)          |
| New Zealand | -0.487    | 0.001*          | 46.77 (8.30)  | 54.28 (6.11)  | 9.05 (1.02)          |
| Sweden      | -0.516    | <0.001*         | 45.03 (8.80)  | 55.44 (7.37)  | 9.24 (1.23)          |
| Latvia      | -0.505    | 0.038*          | 44.65 (8.57)  | 52.21 (6.66)  | 8.70 (1.11)          |
| Germany     | -0.595    | <0.001*         | 40.79 (5.63)  | 53.44 (4.91)  | 8.91 (0.82)          |
| Slovenia    | -0.551    | <0.001*         | 42.40 (9.22)  | 54.37 (5.67)  | 9.06 (0.95)          |
| Lithuania   | -0.059    | 0.849           | 39.07 (7.34)  | 56.56 (6.89)  | 9.43 (1.15)          |
| Finland     | -0.450    | <0.001*         | 40.00 (9.53)  | 8.17 (0.69)   | 49.02 (4.16)         |
| Madagascar  | -0.325    | 0.106           | 40.48 (5.60)  | 54.04 (7.34)  | 9.01 (1.22)          |
| China       | -0.551    | <0.001*         | 33.18 (5.53)  | 58.35 (3.86)  | 9.72 (0.64)          |
| Japan       | -0.337    | <0.001*         | 44.47 (8.42)  | 54.62 (6.67)  | 9.10 (1.11)          |
| Estonia     | -0.641    | 0.002*          | 45.18 (8.07)  | 54.81 (6.75)  | 9.14 (1.13)          |
| Italy       | -0.599    | <0.001*         | 36.67 (9.67)  | 55.69 (5.24)  | 9.28 (0.87)          |
| Switzerland | -0.758    | <0.001*         | 37.80 (2.15)  | 9.22 (1.34)   | 55.34 (8.03)         |
| Hong Kong   | -0.577    | 0.001*          | 50.75 (6.64)  | 54.96 (4.23)  | 9.16 (0.71)          |

|               |        |         |               |              |              |
|---------------|--------|---------|---------------|--------------|--------------|
| France        | -0.592 | <0.001* | 33.00 (7.14)  | 8.23 (0.97)  | 49.36 (5.85) |
| Australia     | -0.663 | <0.001* | 37.78 (12.62) | 8.87 (1.06)  | 53.21 (6.34) |
| Ireland       | -0.300 | 0.118   | 45.90 (7.25)  | 57.63 (6.83) | 9.60 (1.14)  |
| Argentina     | -0.649 | <0.001* | 40.65 (8.69)  | 55.97 (6.52) | 9.33 (1.09)  |
| Uruguay       | -0.585 | <0.001* | 44.46 (9.52)  | 56.95 (7.03) | 9.49 (1.17)  |
| Czech         | -0.926 | <0.001* | 48.45 (6.79)  | 47.60 (1.84) | 7.93 (0.31)  |
| Slovakia      | -0.920 | <0.001* | 38.04 (7.96)  | 57.66 (8.69) | 9.61 (1.45)  |
| Canada        | -0.850 | <0.001* | 36.82 (9.41)  | 57.23 (6.84) | 9.54 (1.14)  |
| Greece        | -0.822 | <0.001* | 39.98 (11.64) | 60.23 (7.66) | 10.04 (1.28) |
| Bulgaria      | -0.820 | <0.001* | 47.75 (7.28)  | 51.53 (4.56) | 8.59 (0.76)  |
| Mongolia      | -0.762 | 0.034*  | 40.09 (11.50) | 53.13 (6.59) | 8.86 (1.10)  |
| Taipei        | -0.793 | <0.001* | 37.51 (11.50) | 53.66 (4.83) | 8.94 (0.80)  |
| Serbia        | -0.890 | <0.001* | 40.93 (9.08)  | 55.41 (7.51) | 9.24 (1.25)  |
| Brazil        | -0.911 | <0.001* | 43.83 (9.70)  | 51.87 (5.55) | 8.64 (0.92)  |
| Great Britain | -0.673 | <0.001* | 39.98 (8.60)  | 56.13 (8.20) | 9.35 (1.37)  |
| South Africa  | -1.066 | <0.001* | 40.96 (10.14) | 55.91 (6.61) | 9.32 (1.10)  |
| USA           | -1.113 | <0.001* | 45.13 (9.07)  | 54.40 (6.64) | 9.07 (1.11)  |
| San Marino    | -0.937 | <0.001* | 43.29 (7.83)  | 53.21 (5.58) | 8.87 (0.93)  |
| Malaysia      | -1.184 | <0.001* | 39.58 (9.99)  | 58.08 (8.10) | 9.68 (1.35)  |
| Indonesia     | -1.450 | <0.001* | 40.73 (9.32)  | 51.65 (5.62) | 8.61 (0.94)  |
| Philippines   | -1.585 | <0.001* | 41.70 (7.91)  | 53.69 (5.85) | 8.95 (0.98)  |
| Constant      | 58.520 | <0.001* |               |              |              |
| Event year    | -0.024 | <0.001* |               |              |              |
| Age x Year    | -1.051 | <0.001* |               |              |              |

Note: \* indicates statistically significant differences for running speed compared to Russia. Results are presented as mean and standard deviation.

**Supplementary Table 5.** Descriptive statistics (mean and standard deviation) and linear regression results to verify the predictors associated with running speed in the top 10 male ultra-marathoners from different countries.

|             | $\beta$   | <i>p</i> -value | Age (years)   | Distance (km) | Running speed (km/h) |
|-------------|-----------|-----------------|---------------|---------------|----------------------|
|             |           |                 | Mean (Std)    | Mean (Std)    | Mean (Std)           |
| Tunisia     | Reference | Reference       | 45.47 (3.34)  | 75.52 (4.64)  | 12.59 (0.77)         |
| Belgium     | 1.97      | <0.001*         | 43.59 (8.10)  | 73.50 (7.73)  | 12.25 (1.29)         |
| Russia      | 1.54      | <0.001*         | 40.10 (11.08) | 70.84 (9.06)  | 15.54 (11.81)        |
| Norway      | 1.67      | <0.001*         | 43.01 (9.88)  | 70.11 (7.19)  | 14.80 (11.69)        |
| Slovenia    | 1.38      | <0.001*         | 39.05 (8.73)  | 69.11 (7.17)  | 11.52 (1.19)         |
| Lithuania   | 1.51      | <0.001*         | 40.59 (7.25)  | 68.71 (6.71)  | 14.88 (11.45)        |
| Netherland  | 1.10      | <0.001*         | 46.24 (8.40)  | 62.35 (5.82)  | 14.54 (11.19)        |
| Poland      | 1.20      | <0.001*         | 37.98 (9.12)  | 67.10 (10.09) | 15.37 (11.18)        |
| Spain       | 1.13      | <0.001*         | 42.23 (8.94)  | 66.80 (8.15)  | 11.13 (1.36)         |
| Hungary     | 0.97      | <0.001*         | 39.91 (7.83)  | 66.26 (7.54)  | 11.04 (1.26)         |
| Denmark     | 1.05      | <0.001*         | 40.86 (7.56)  | 66.23 (7.90)  | 11.04 (1.32)         |
| Sweden      | 0.95      | <0.001*         | 41.36 (8.93)  | 66.01 (7.79)  | 11.00 (1.30)         |
| Latvia      | 0.98      | <0.001*         | 42.76 (7.95)  | 65.20 (7.50)  | 11.45 (1.12)         |
| Germany     | 0.83      | <0.001*         | 45.12 (9.01)  | 64.99 (8.37)  | 10.83 (1.39)         |
| Italy       | 0.89      | <0.001*         | 45.07 (8.25)  | 64.81 (7.75)  | 10.65 (1.47)         |
| Finland     | 0.80      | <0.001*         | 44.03 (9.16)  | 64.54 (6.89)  | 10.76 (1.15)         |
| Romania     | 0.70      | <0.001*         | 37.68 (8.43)  | 64.16 (7.13)  | 13.13 (10.69)        |
| Switzerland | 0.78      | <0.001*         | 45.99 (9.28)  | 64.12 (8.04)  | 10.69 (1.34)         |
| France      | 0.62      | <0.001*         | 45.17 (8.86)  | 63.99 (7.63)  | 10.67 (1.27)         |
| China       | 0.74      | <0.001*         | 37.21 (9.99)  | 63.99 (8.44)  | 10.66 (1.41)         |
| Japan       | 0.67      | <0.001*         | 42.95 (9.81)  | 63.87 (8.84)  | 9.37 (1.25)          |
| Czech       | 0.30      | 0.001*          | 37.79 (9.38)  | 63.50 (6.73)  | 10.58 (1.12)         |
| Bosnia      | 0.48      | 0.069           | 39.96 (9.97)  | 63.09 (9.28)  | 10.51 (1.55)         |
| Slovakia    | 0.29      | 0.004*          | 39.92 (9.91)  | 63.08 (6.69)  | 10.51 (1.11)         |
| Hong Kong   | 0.67      | 0.001*          | 42.10 (10.27) | 62.95 (5.51)  | 10.49 (0.92)         |
| Belarus     | 0.32      | 0.033*          | 46.51 (13.45) | 62.92 (8.83)  | 10.49 (1.47)         |
| Argentina   | 0.47      | <0.001*         | 43.05 (8.49)  | 62.55 (6.74)  | 10.42 (1.12)         |

|               |       |         |               |               |               |
|---------------|-------|---------|---------------|---------------|---------------|
| Greece        | 0.30  | 0.009*  | 42.03 (8.36)  | 62.22 (6.91)  | 10.37 (1.15)  |
| Bulgaria      | 0.28  | 0.110   | 36.62 (8.26)  | 62.20 (4.54)  | 10.37 (0.76)  |
| Uruguay       | 0.35  | 0.027*  | 40.94 (8.79)  | 61.54 (6.06)  | 10.26 (1.01)  |
| Croatia       | 0.31  | 0.204   | 39.65 (9.14)  | 61.23 (6.25)  | 10.20 (1.04)  |
| South Africa  | 0.16  | 0.436   | 41.25 (7.62)  | 61.21 (10.67) | 13.87 (10.20) |
| Taipei        | 0.30  | <0.001* | 45.25 (8.52)  | 60.89 (6.19)  | 10.15 (1.03)  |
| Estonia       | 0.07  | 0.730   | 41.27 (8.31)  | 60.59 (8.24)  | 10.10 (1.37)  |
| Austria       | 1.16  | <0.001* | 40.78 (8.75)  | 67.79 (7.37)  | 11.30 (1.23)  |
| Iceland       | -0.02 | 0.955   | 47.89 (7.30)  | 60.54 (5.80)  | 10.80 (1.29)  |
| Portugal      | -0.08 | 0.752   | 38.41 (10.33) | 60.22 (8.24)  | 12.28 (10.04) |
| Serbia        | 0.03  | 0.761   | 42.87 (11.44) | 60.05 (7.68)  | 10.01 (1.28)  |
| Ukraine       | -0.19 | 0.193   | 37.35 (10.14) | 59.58 (8.99)  | 9.93 (1.50)   |
| Brazil        | -0.12 | 0.195   | 41.12 (8.69)  | 58.81 (7.56)  | 9.80 (1.26)   |
| Mongolia      | -0.49 | 0.178   | 30.67 (7.99)  | 58.66 (7.37)  | 11.55 (9.78)  |
| Ireland       | 0.09  | 0.673   | 43.76 (9.78)  | 58.17 (9.62)  | 10.09 (0.97)  |
| Canada        | -0.37 | <0.001* | 44.62 (10.42) | 58.58 (7.37)  | 9.76 (1.23)   |
| Korea         | -0.38 | 0.090   | 45.72 (7.50)  | 58.16 (7.05)  | 10.87 (1.25)  |
| New Zealand   | -0.46 | <0.001* | 44.44 (11.60) | 58.01 (7.15)  | 12.27 (9.67)  |
| Great Britain | -0.08 | 0.236   | 45.16 (9.25)  | 57.60 (8.82)  | 9.60 (1.47)   |
| Luxembourg    | -0.47 | 0.144   | 39.00 (12.81) | 57.47 (9.71)  | 12.64 (9.58)  |
| United States | -0.66 | <0.001* | 41.40 (10.04) | 56.36 (7.43)  | 9.39 (1.24)   |
| Kazakhstan    | -0.80 | 0.003*  | 43.09 (14.50) | 56.21 (7.49)  | 9.69 (1.18)   |
| Indonesia     | -0.34 | 0.077   | 35.71 (11.26) | 55.83 (8.91)  | 9.31 (1.49)   |
| Mexico        | -1.04 | <0.001* | 38.00 (7.00)  | 54.30 (8.22)  | 11.53 (9.05)  |
| Philippines   | -1.04 | 0.004*  | 40.67 (11.38) | 52.74 (5.67)  | 10.83 (8.79)  |
| Paraguay      | -1.48 | 0.017*  | 35.00 (5.35)  | 51.70 (6.62)  | 10.67 (8.62)  |
| Malaysia      | -1.47 | <0.001* | 38.19 (8.38)  | 50.37 (4.16)  | 10.20 (8.39)  |
| Constant      | 86.62 | <0.001* |               |               |               |
| Event year    | -0.04 | <0.001* |               |               |               |
| Age x Year    | 0.00  | <0.001* |               |               |               |

Note: \* indicates statistically significant differences for running speed compared to Tunisia. Results are presented as mean and standard deviation.

**Supplementary Table 6.** Descriptive statistics (mean and standard deviation) and linear regression results to verify the predictors associated with running speed in the top 100 male ultra-marathoners from different countries.

|              | $\beta$   | <i>p</i> -value | Age (years)   | Distance (km) | Running speed (km/h) |
|--------------|-----------|-----------------|---------------|---------------|----------------------|
|              |           |                 | Mean (Std)    | Mean (Std)    | Mean (Std)           |
| Tunisia      | Reference | Reference       | 44.82 (4.59)  | 72.95 (8.78)  | 12.16 (1.46)         |
| Belgium      | 0.62      | <0.001*         | 45.60 (9.53)  | 64.78 (9.63)  | 10.80 (1.60)         |
| France       | -0.32     | <0.001*         | 46.68 (9.61)  | 57.85 (7.94)  | 9.64 (1.32)          |
| Lithuania    | 0.67      | <0.001*         | 41.43 (7.68)  | 62.76 (8.36)  | 0.46 (1.39)          |
| Latvia       | 0.43      | 0.03*           | 42.86 (8.96)  | 61.99 (8.81)  | 10.331.47)           |
| Hungary      | 0.02      | 0.81            | 41.27 (8.57)  | 60.11 (8.19)  | 10.02 (1.36)         |
| Iceland      | -0.10     | 0.80            | 45.33 (7.81)  | 59.93 (5.28)  | 9.99 (0.88)          |
| Denmark      | -0.02     | 0.85            | 42.86 (7.91)  | 59.72 (7.33)  | 9.95 (1.22)          |
| Bosnia       | -0.15     | 0.52            | 40.19 (10.52) | 59.18 (9.76)  | 9.86 (1.63)          |
| Austria      | -0.15     | 0.08            | 43.67 (9.76)  | 59.41 (8.25)  | 9.90 (1.37)          |
| Slovenia     | -0.22     | 0.03*           | 41.76 (8.90)  | 59.05 (8.79)  | 9.84 (1.47)          |
| Romania      | -0.05     | 0.72            | 39.14 (8.55)  | 59.35 (8.00)  | 9.89 (1.33)          |
| Switzerland  | 0.10      | 0.36            | 46.74 (9.60)  | 60.07 (8.52)  | 10.01 (1.42)         |
| Poland       | 0.31      | 0.01*           | 38.62 (9.04)  | 61.07 (10.01) | 10.18 (1.67)         |
| Slovakia     | -0.35     | 0.00*           | 41.52 (11.32) | 58.74 (7.45)  | 9.79 (1.24)          |
| Mongolia     | -0.65     | 0.04*           | 30.22 (7.67)  | 57.86 (6.86)  | 9.64 (1.14)          |
| Germany      | -0.12     | 0.15            | 47.36 (9.67)  | 58.85 (8.28)  | 9.81 (1.38)          |
| Kazakhstan   | -0.48     | 0.04*           | 40.03 (13.06) | 57.62 (8.09)  | 9.60 (1.35)          |
| Australia    | -0.46     | <0.001*         | 44.17 (9.93)  | 57.57 (8.30)  | 9.60 (1.38)          |
| Argentina    | -0.30     | 0.00*           | 43.33 (9.37)  | 57.39 (7.71)  | 9.57 (1.28)          |
| Finland      | -0.36     | <0.001*         | 45.20 (9.87)  | 57.28 (7.65)  | 9.55 (1.27)          |
| South Africa | -0.39     | 0.02*           | 40.90 (8.45)  | 57.68 (9.41)  | 9.61 (1.57)          |
| Serbia       | -0.42     | <0.001*         | 45.04 (13.18) | 56.91 (7.79)  | 9.48 (1.30)          |
| Portugal     | -0.27     | 0.15            | 41.16 (9.55)  | 58.75 (7.81)  | 9.79 (1.30)          |
| Ireland      | -0.14     | 0.44            | 42.46 (9.39)  | 57.85 (9.09)  | 9.64 (1.52)          |
| Ecuador      | -0.87     | 0.03*           | 32.18 (7.99)  | 56.63 (5.91)  | 9.44 (0.98)          |

|               |       |         |               |              |              |
|---------------|-------|---------|---------------|--------------|--------------|
| China         | -0.28 | 0.01*   | 40.41 (10.40) | 57.73 (7.71) | 9.62 (1.28)  |
| Greece        | -0.63 | <0.001* | 42.37 (8.95)  | 56.49 (7.53) | 9.41 (1.26)  |
| Bulgaria      | -0.65 | <0.001* | 36.68 (8.49)  | 56.25 (6.55) | 9.38 (1.09)  |
| Brazil        | -0.51 | <0.001* | 41.57 (9.13)  | 56.36 (7.43) | 9.39 (1.24)  |
| San Marino    | -0.02 | 0.96    | 59.77 (6.43)  | 55.99 (5.34) | 9.33(0.89)   |
| Korea         | -0.76 | <0.001* | 46.09 (8.16)  | 55.71 (6.63) | 9.28 (1.11)  |
| Great-Britain | -0.41 | <0.001* | 45.51 (9.29)  | 55.77 (8.35) | 9.29 (1.39)  |
| Canada        | -0.88 | <0.001* | 47.28 (11.29) | 55.19 (6.98) | 9.20 (1.16)  |
| Indonesia     | -0.49 | 0.00*   | 36.40 (9.66)  | 55.17 (8.18) | 9.20 (1.36)  |
| United States | -1.00 | <0.001* | 43.61 (10.95) | 53.96 (6.99) | 8.99 (1.16)  |
| Taipei        | -0.75 | <0.001* | 46.64 (9.19)  | 54.12 (6.33) | 9.02 (1.06)  |
| Turkey        | -0.76 | 0.00*   | 42.68 (8.94)  | 54.67 (6.49) | 9.11 (1.08)  |
| Philippines   | -1.05 | 0.00*   | 41.67 (10.32) | 52.73 (5.54) | 8.79 (0.92)  |
| Chile         | -0.18 | 0.78    | 32.00 (4.08)  | 59.82 (8.16) | 9.97 (1.36)  |
| Estonia       | -0.34 | 0.07    | 41.50 (8.69)  | 57.92 (8.19) | 9.65 (1.36)  |
| Sweden        | -0.23 | 0.01*   | 44.87 (10.41) | 58.22 (7.81) | 9.70 (1.30)  |
| Japan         | -0.19 | 0.03*   | 44.17 (9.93)  | 57.31 (8.52) | 9.55 (1.42)  |
| New Zealand   | -0.59 | <0.001* | 44.37 (11.06) | 57.00 (6.96) | 9.50 (1.16)  |
| Croatia       | -0.21 | 0.22    | 42.45 (9.82)  | 58.30 (6.69) | 9.72 (1.12)  |
| Luxembourg    | -0.27 | 0.31    | 41.96 (12.49) | 58.95 (8.26) | 9.82(1.38)   |
| Uruguay       | -0.51 | <0.001* | 42.09 (9.21)  | 56.23 (6.78) | 9.37 (1.13)  |
| Italy         | -0.36 | <0.001* | 49.12 (9.37)  | 56.44(7.67)  | 9.41 (1.28)  |
| Algeria       | -0.80 | 0.04*   | 45.64 (11.23) | 55.52 (3.95) | 9.25 (0.66)  |
| Hong Kong     | -0.55 | <0.001* | 45.59 (11.04) | 54.76 (7.17) | 9.13 (1.20)  |
| Madagascar    | 0.44  | 0.31    | 37.44 (7.00)  | 65.01 (9.86) | 10.83 (1.64) |
| Mexico        | -0.86 | 0.00*   | 39.70 (8.49)  | 55.03 (7.89) | 9.17 (1.32)  |
| Paraguay      | -1.48 | 0.02*   | 35.00 (5.35)  | 51.70 (6.62) | 8.62 (1.10)  |
| Malaysia      | -1.34 | <0.001* | 41.03 (10.94) | 50.59 (4.23) | 8.43 (0.71)  |
| Russia        | 0.45  | <0.001* | 43.75 (11.93) | 63.69 (9.51) | 10.62 (1.59) |
| Netherland    | 0.13  | 0.13    | 48.37 (9.22)  | 61.02 (7.99) | 10.17 (1.33) |
| Spain         | 0.04  | 0.64    | 43.95 (9.31)  | 59.66 (9.30) | 9.94 (1.55)  |

|            |       |         |               |              |              |
|------------|-------|---------|---------------|--------------|--------------|
| Norway     | 0.00  | 0.99    | 46.04 (11.09) | 59.33 (8.62) | 9.89 (1.44)  |
| Peru       | 0.62  | 0.08    | 34.29 (2.09)  | 62.80 (7.92) | 10.47 (1.32) |
| Ukraine    | -0.26 | 0.07    | 39.98 (10.86) | 59.16 (8.44) | 9.86 (1.41)  |
| Czech      | -0.44 | <0.001* | 39.80 (10.42) | 58.37 (7.80) | 9.73 (1.30)  |
| Constant   | 83.26 | <0.001* |               |              |              |
| Event year | -0.04 | <0.001* |               |              |              |
| Age x year | 0.00  | <0.001* |               |              |              |

Note: \* indicates statistically significant differences for running speed, compared to Tunisia. Results are presented as mean and standard deviation.
